# Supplementary material for: Rogation ceremonies: a key to understanding past drought variability in northeastern Spain since 1650
Source: Copernicus journal article supplement (doi:10.5194/cp-15-1647-2019), 2019-09-02
Supplement: Supplementary file 1 [file cp-15-1647-2019-supplement.pdf]

Supplement of *Clim. Past*, 15, 1647–1664, 2019  
<https://doi.org/10.5194/cp-15-1647-2019-supplement>  
© Author(s) 2019. This work is distributed under  
the Creative Commons Attribution 4.0 License.

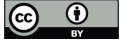

*Supplement of*

## **Rogation ceremonies: a key to understanding past drought variability in northeastern Spain since 1650**

**Ernesto Tejedor et al.**

*Correspondence to:* Miguel Ángel Saz (masaz@unizar.es)

The copyright of individual parts of the supplement might differ from the CC BY 4.0 License.

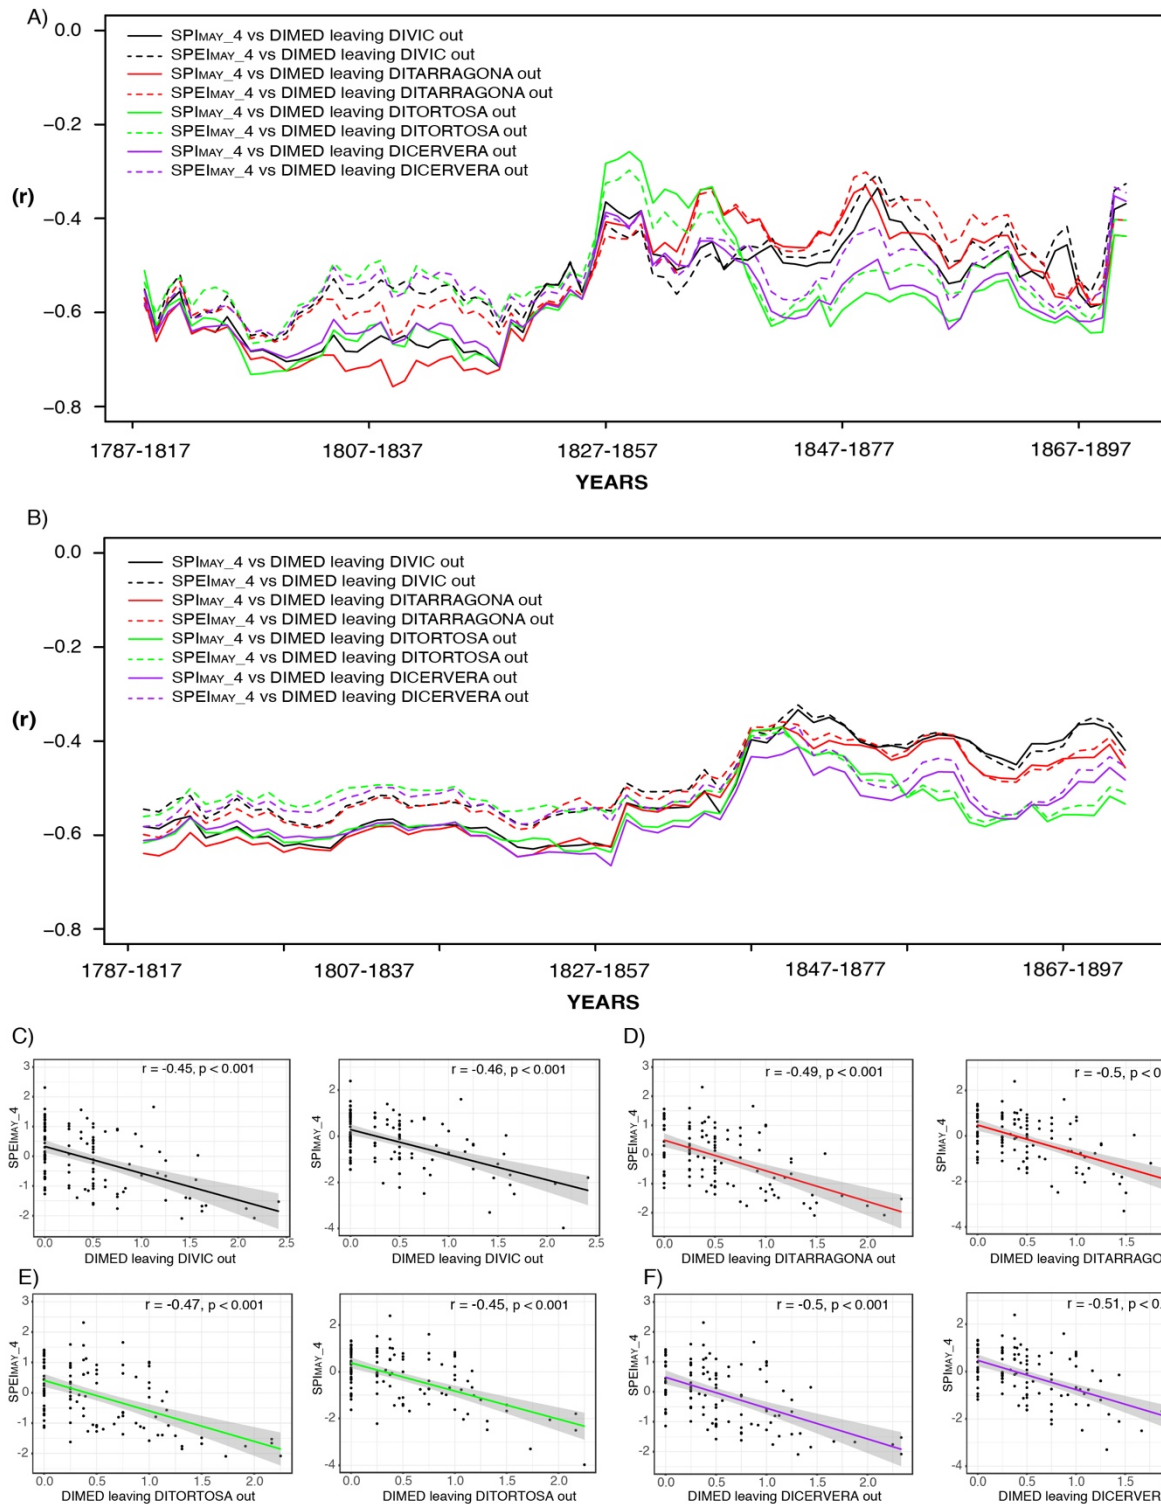

Figure S1. A) 30y moving correlation between a DIMED version leaving one out and the instrumental computed SPI and SPE. B) Same but 50y moving correlations. C) Correlation (Spearman) between DIMED leaving DIVIC out and SPI<sub>MAY\_4</sub>, and SPE<sub>MAY\_4</sub> for the full period (1787-1899). D) Correlation between DIMED leaving DITARRAGONA out and SPI<sub>MAY\_4</sub>, and

SPEIMAY\_4 for the full period (1787-1899). E) Correlation between DIMED leaving DITORTOSA out and SPIMAY\_4, and SPEIMAY\_4 for the full period (1787-1899). F) Correlation between DIMED leaving DICERVERA out and SPIMAY\_4, and SPEIMAY\_4 for the full period (1787-1899).
